# Supplementary material for: Adults’ with hearing loss perceived listening ability in daily communication: protocol for a systematic review and qualitative meta-synthesis
Source: HighWire-hosted journal article supplement (doi:10.1136/bmjopen-2021-051183), 2022-03-01
Supplement: bmjopen-2021-051183supp001_data_supplement.pdf [file bmjopen-2021-051183supp001_data_supplement.pdf]

**Adults' with hearing loss perceived listening ability in daily communication: Protocol for a systematic review and meta-synthesis**

## Supplementary File – Medline Search Strategy

- 1 ((communication or listen\* or auditory or aural or spoken or speech\*OR heaing or listen\*) adj3 (function\* or strateg\* or tactic\* or breakdown or repair or percept\*)).ti,ab.
- 2 auditory perception/
- 3 Speech Perception/
- 4 Communication/
- 5 or/1-4
- 6 deaf\*.ti,ab.
- 7 (hearing aid\* or cochlear or implant\*).ti,ab.
- 8 (hearing adj3 (loss or impair\* or disorder)).ti,ab.
- 9 Hearing Loss/
- 10 Deafness/ or Cochlear Implants/ or Persons with Hearing Impairments/
- 11 or/6-10
- 12 (Qualitat\* adj2 (research or method\*)).ab,ti.
- 13 ((Grounded adj3 theory) or mix method\* or phenomenolog\* or ethnograph\* or interview\* or focus group\* or (thematic adj3 analys\*)).ab,ti.
- 14 Grounded Theory/
- 15 Interview, Psychological/ or Interview/
- 16 Focus Groups/
- 17 (((("semi-structured" or semistructured or unstructured or informal or "in-depth" or indepth or "face-to-face" or structured or guide) adj3 (interview\* or discussion\* or questionnaire\*)) or (focus group\* or qualitative or ethnograph\* or fieldwork or "field work" or "key informant")).ti,ab.
- 18 or/12-17
- 19 5 and 11 and 18
